# Supplementary material for: Bacterial Cell Wall Analogue Peptides Control the Oligomeric States and Activity of the Glycopeptide Antibiotic Eremomycin: Solution NMR and Antimicrobial Studies
Source: PubMed Central journal article supplement (PMC7911593; doi:10.3390/ph14020083), 2021-01-22
Supplement: pharmaceuticals-14-00083-s001.pdf [file pharmaceuticals-14-00083-s001.pdf]

# Bacterial cell wall analogue peptides control the oligomeric states and activity of the glycopeptide antibiotic eremomycin. Solution NMR and antimicrobial studies.

László Izsepi,<sup>1,2</sup> Réka Erdei,<sup>2</sup> Anna N. Tevyashova,<sup>3</sup> Natalia E. Grammatikova,<sup>3</sup> Andrey E. Shchekotikhin,<sup>3</sup> Pál Herczegh<sup>4</sup> and Gyula Batta<sup>2\*</sup>

<sup>1</sup> Doctoral School of Chemistry, University of Debrecen, H-4032 Debrecen, Egyetem tér 1., Hungary; [izsepi.laszlo@gmail.com](mailto:izsepi.laszlo@gmail.com) (L.I.)

<sup>2</sup> Department of Organic Chemistry, University of Debrecen, H-4032 Debrecen, Egyetem tér 1., Hungary; [erdeii@yahoo.com](mailto:erdeii@yahoo.com) (R.E.)

<sup>3</sup> Gause Institute of New Antibiotics, 11 B. Pirogovskaya, Moscow, 119021, Russia; [chulis@mail.ru](mailto:chulis@mail.ru), (A.T.) [shchekotikhin@mail.ru](mailto:shchekotikhin@mail.ru), (A.E.S.) [ngrammatikova@yandex.ru](mailto:ngrammatikova@yandex.ru), (N.E.G.)

<sup>4</sup> Department of Pharmaceutical Chemistry, University of Debrecen, H-4032 Debrecen, Egyetem tér 1., Hungary; [herczegh.pal@pharm.unideb.hu](mailto:herczegh.pal@pharm.unideb.hu) (P.H.)

<sup>2\*</sup> Correspondence: [batta@unideb.hu](mailto:batta@unideb.hu) (G.B.);

## Supplementary material:

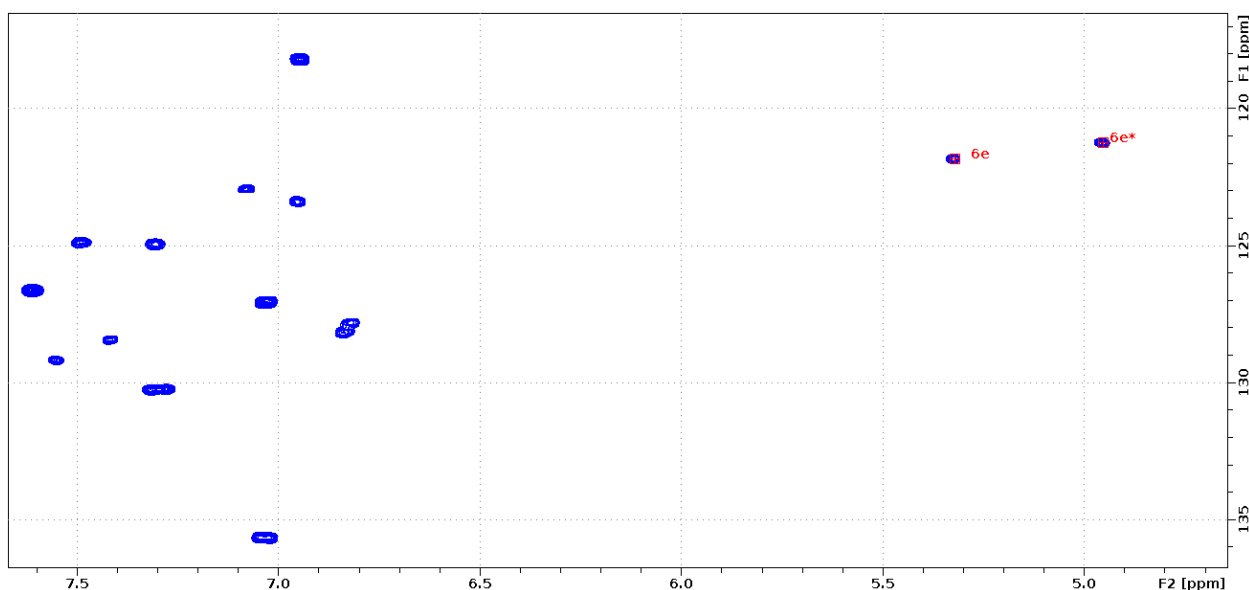

**Figure S1.**  $^1\text{H}$ - $^{13}\text{C}$  HSQC spectrum of the eremomycin dimer at 298K, at pH 4.5 in 20 mM acetate ( $\text{D}_2\text{O}$ ) buffer (Bruker NEO-700 NMR spectrometer, equipped with Prodigy, TCI probehead). Signal doubling in the aromatic region is observed, and the strongest impact is seen for the 6e signals, possessing unusual  $\sim 5$  ppm  $^1\text{H}$  chemical shifts for aromatic CH groups, but characteristic for glycopeptide dimers.

Materials and methods for antimicrobial tests:

Antibiotics and Other Reagents



|                     |     |     |     |     |     |     |
|---------------------|-----|-----|-----|-----|-----|-----|
| <i>E.faecalis</i> 9 | 0.5 | 0.5 | 0.5 | 0.5 | 0.5 | 0.5 |
|---------------------|-----|-----|-----|-----|-----|-----|

The minimum inhibitory concentration of Eremomycin in all studied ratios of Eremomycin and N-Ac-D-Ala-D-Ala (from 1:1 to 100:1 ligand:antibiotic ratio) did not change.

In contrast to this experience, previous analysis showed that in the ratio of Eremomycin to ligand 1: 1000 - 1: 4000/8000 antimicrobial activity decreased by 2 dilutions for *Enterococcus faecalis* 9 and two strains of *S. aureus* respectively (please, see previous results - Checkerboard method).
